# Supplementary material for: Mucoepidermoid carcinoma of the salivary glands revisited with special reference to histologic grading and CRTC1/3-MAML2 genotyping
Source: Springer Nature journal article supplement (doi:10.1007/s00428-021-03146-x), 2021-07-06
Supplement: MOESM1 [file 19336130]

## Supplementary Information

### Virchows Archiv

#### **Mucoepidermoid carcinoma of the salivary glands revisited with special reference to histologic grading and *CRTC1/3-MAML2* genotyping**

André Fehr<sup>1\*\*</sup>, Sarah Werenicz<sup>2#</sup>, Pietro Trocchi<sup>3#</sup>, Markus Falk<sup>4</sup>, Reinhard E. Friedrich<sup>2</sup>, Angelika Stamm<sup>5</sup>, Andreas Stang<sup>3,6</sup>, Florian Oesterling<sup>6</sup>, Laura Khil<sup>6</sup>, Göran Stenman<sup>1</sup>, Werner Böcker<sup>7</sup>, Katharina Tiemann<sup>4</sup>, Thomas Lönning<sup>7</sup>

# equal authorship

<sup>1</sup> Sahlgrenska Center for Cancer Research, Department of Pathology, University of Gothenburg, Sahlgrenska University Hospital, Gothenburg, Sweden

<sup>2</sup> Department of Oral and Craniomaxillofacial Surgery, Eppendorf University Hospital, University of Hamburg, Hamburg, Germany

<sup>3</sup> Institute of Medical Informatics, Biometry and Epidemiology (IMIBE), University Hospital Essen, Essen, Germany

<sup>4</sup> Institute for Hematopathology, Hamburg, Germany

<sup>5</sup> Faculty of Medicine, Justus-Liebig-University Giessen, Giessen, Germany

<sup>6</sup> Cancer Registry North Rhine-Westphalia, Bochum, Germany

<sup>7</sup> Gerhard Seifert Reference-Center - Hansepathnet, Hamburg, Germany

#### **\* Corresponding author**

André Fehr: andre.fehr@gu.se

**Supplementary Table** Interobserver agreement of the grading (high- vs. low-) of 155 mucoepidermoid carcinomas between two pathologists according to potential modifiers of the agreement

|                                 | <b>AFIP</b>               |                       | <b>Brandwein</b>         |                       |
|---------------------------------|---------------------------|-----------------------|--------------------------|-----------------------|
|                                 | <b>Agreement (95%CI*)</b> |                       | <b>Agreement (95%CI)</b> |                       |
|                                 | <b>Observed</b>           | <b>Weighted Kappa</b> | <b>Observed</b>          | <b>Weighted Kappa</b> |
| <b>Overall (n=155)</b>          | 0.97 (0.93-0.99)          | 0.81 (0.65-0.97)      | 0.96 (0.92-0.99)         | 0.83 (0.71-0.96)      |
| <b>Age at diagnosis (years)</b> |                           |                       |                          |                       |
| 0-49 (n=77)                     | 0.99 (0.93-1.0)           | 0.66 (0.04-1.0)       | 0.99 (0.93-1.0)          | 0.79 (0.40-1.0)       |
| 50+ (n=78)                      | 0.95 (0.87-0.99)          | 0.82 (0.66-0.99)      | 0.94 (0.86-0.98)         | 0.82 (0.67-0.97)      |
| <b>Stage</b>                    |                           |                       |                          |                       |
| pT1 (n=108)                     | 0.98 (0.93-1.0)           | 0.74 (0.39-1.0)       | 0.97 (0.92-0.99)         | 0.81 (0.60-1.0)       |
| >pT1 (n=47)                     | 0.94 (0.82-0.99)          | 0.82 (0.61-1.0)       | 0.94 (0.82-0.99)         | 0.84 (0.66-1.0)       |
| <b>Anatomic Site</b>            |                           |                       |                          |                       |
| Major glands (n=69)             | 0.94 (0.86-0.98)          | 0.68 (0.39-0.97)      | 0.97 (0.90-1.0)          | 0.89 (0.74-1.0)       |
| Minor glands (n=86)             | 0.99 (0.94-1.0)           | 0.93 (0.79-1.0)       | 0.95 (0.89-0.99)         | 0.77 (0.56-0.99)      |
| <b>Gene Fusion</b>              |                           |                       |                          |                       |
| Positive (n=124)                | 0.99 (0.96-1.0)           | 0.88 (0.66-1.0)       | 0.98 (0.96-1.0)          | 0.83 (0.59-1.0)       |
| Negative (n=31)                 | 0.87 (0.70-0.96)          | 0.71 (0.44-0.97)      | 0.87 (0.70-0.96)         | 0.74 (0.51-0.98)      |

\* CI, confidence interval
